# Supplementary material for: Stability of hepatitis B virus pregenomic RNA in plasma specimens under various temperatures and storage conditions
Source: PeerJ. 2021 Apr 14;9:e11207. doi: 10.7717/peerj.11207 (PMC8052958; doi:10.7717/peerj.11207)
Supplement: Supplemental Information 3 [file peerj-09-11207-s003.xlsx]

## Sheet: Sheet1
No.	code	Collection date	HBV-RNA (copeis/ml.)	HBV-RNA Temp 4 °C (copies/ml)					HBV-RNA Temp 25 °C (copies/ml)					HBV-RNA (log)	HBV-RNA Temp 4 °C (log)					HBV-RNA Temp 25 °C (log)
				2 hr.	6 hr.	12 hr.	24 hr.	48 hr.	2 hr.	6 hr.	12 hr.	24 hr.	48 hr.		2 hr.	6 hr.	12 hr.	24 hr.	48 hr.	2 hr.	6 hr.	12 hr.	24 hr.	48 hr.
1	PG24	2019-01-10	7560	2700	4995	5670	4590	3645	2565	5265	4455	7560	3915	3.88	3.43136	3.69854	3.75358	3.66181	3.5617	3.40909	3.7214	3.64885	3.87852	3.59273
2	PG29	2019-01-24	12420000	12946500	18184500	13284000	16227000	10408500	16092000	15214500	16672500	15606000	15012000	7.09412	7.11215	7.2597	7.12333	7.21024	7.01739	7.20661	7.18226	7.222	7.19329	7.17644
3	PG32	2019-01-31	180900	160650	190350	124200	155250	159300	163350	160650	141750	152550	159300	5.25744	5.20588	5.27955	5.09412	5.19103	5.20222	5.21312	5.20588	5.15152	5.18341	5.2
4	PG41	2019-02-27	54405000	46170000	44685000	35910000	39690000	46710000	45630000	41580000	36585000	42795000	39555000	7.73564	7.66436	7.65016	7.55522	7.59868	7.66941	7.65925	7.61888	7.5633	7.63139	7.5972
5	PG42	2019-02-27	12150	17550	18900	20250	20250	17550	18900	17550	20250	20250	14850	4.08458	4.24428	4.27646	4.30643	4.30643	4.24428	4.27646	4.24428	4.30643	4.30643	4.17173
6	PG44	2019-02-27	12150	10800	16200	11340	7695	7695	8775	9990	10260	9585	10530	4.08458	4.03342	4.20952	4.05461	3.88621	3.88621	3.94325	3.99957	4.01115	3.98159	4.02243
7	PG46	2019-02-28	6210000	5400000	5386500	5076000	922050	4536000	5440500	5373000	4954500	5103000	4050000	6.79309	6.73239	6.73131	6.70552	6.61	6.65667	6.73564	6.73022	6.69	6.70783	6.69
8	PG47	2019-03-05	33750	40500	28350	22950	18900	21600	28350	27000	27000	18900	28350	4.52827	4.60746	4.45255	4.36078	4.27646	4.33445	4.45255	4.43136	4.43136	4.27646	4.45255
9	PG48	2019-03-05	5683500	6115500	5548500	5508000	5305500	4887000	5332500	5521500	5440500	5751000	5197500	6.75462	6.78643	6.74418	6.74099	6.72473	6.68904	6.72693	6.74206	6.73564	6.75974	6.71579
10	PG50	2019-03-05	21600	14850	16200	21600	20250	22950	31050	10800	20250	17550	24300	4.33445	4.17173	4.20952	4.33445	4.30643	4.36078	4.49206	4.03342	4.30643	4.24428	4.38561
11	PG52	2019-03-05	31050	44550	31050	36450	32400	31050	36450	41850	37800	35100	35100	4.49206	4.64885	4.49206	4.5617	4.51055	4.49206	4.5617	4.6217	4.57749	4.54531	4.54531
12	PG54	2019-03-06	2322000	2281500	2700000	2848500	3037500	2740500	2592000	2943000	2848500	2875500	2700000	6.36586	6.35822	6.43136	6.45462	6.48252	6.43783	6.41363	6.46879	6.45462	6.45871	6.43136
13	PG55	2019-03-06	16200	18900	16200	14850	17550	20250	18900	13500	9450	12150	9450	4.20952	4.27646	4.20952	4.17173	4.24428	4.30643	4.27646	4.13033	3.97543	4.08458	3.97543
14	PG58	2019-03-19	61830000	61965000	52650000	67095000	68985000	69525000	77760000	69390000	77625000	70065000	61155000	7.7912	7.79215	7.7214	7.82669	7.83875	7.84214	7.89076	7.8413	7.89	7.8455	7.78643
15	PG59	2019-03-19	49275000	64530000	68850000	65610000	68310000	65745000	63855000	68715000	68310000	75330000	68580000	7.69263	7.80976	7.8379	7.81697	7.83448	7.81786	7.80519	7.83705	7.83448	7.87697	7.8362
16	PG60	2019-03-19	57375000	65340000	64665000	66960000	55620000	56700000	81148500	70470000	64800000	58590000	52785000	7.75872	7.81518	7.81067	7.82582	7.74523	7.75358	7.90928	7.848	7.81158	7.76782	7.72251
17	PG61	2019-03-21	7425	5670	8235	9720	8505	7290	7155	7695	7695	7560	7425	3.8707	3.75358	3.91566	3.98767	3.92967	3.86273	3.85461	3.88621	3.88621	3.87852	3.8707
18	PG62	2019-03-25	10800	7965	3240	3780	2700	4320	6480	3375	5940	5130	3240	4.03342	3.90119	3.51055	3.57749	3.43136	3.63548	3.81158	3.52827	3.77379	3.71012	3.51055
19	PG66	2019-03-25	20655000	20115000	19845000	14715000	13500000	11070000	14175000	15120000	16200000	13635000	13770000	7.32	7.30352	7.29765	7.16776	7.13033	7.04415	7.15152	7.17955	7.20952	7.13466	7.13893
20	PG68	2019-03-28	22342500	19251000	20344500	20668500	19804500	17968500	20344500	18589500	19183500	18292500	17563500	7.34913	7.28445	7.30845	7.31531	7.3	7.25	7.30845	7.26927	7.28293	7.26227	7.24461
21	PG69	2019-04-02	2835000	2565000	1944000	2092500	2160000	2173500	2389500	2133000	2200500	2376000	2281500	6.45255	6.40909	6.2887	6.32067	6.33445	6.33716	6.37831	6.32899	6.34252	6.37585	6.35822
22	PG70	2019-04-04	81810000	77220000	81540000	68040000	74115000	75600000	81675000	78705000	83430000	82080000	73305000	7.91	7.88773	7.91137	7.83276	7.86991	7.87852	7.91209	7.896	7.92132	7.91424	7.86513
23	PG71	2019-04-09	108000	82350	122850	102600	85050	89100	120150	114750	76950	108000	135000	5.03342	4.91566	5.08938	5.01115	4.92967	4.94988	5.07972	5.05975	4.88621	5.03342	5.13033
24	PG72	2019-04-18	60480000	72360000	66825000	61020000	71820000	66285000	63585000	65340000	54540000	66285000	50490000	7.78	7.8595	7.82494	7.78547	7.85625	7.82142	7.80335	7.81518	7.73672	7.82142	7.70321
25	PG74	2019-05-02	912600	783000	1007100	1030050	986850	1011150	918000	911250	945000	845100	854550	5.96028	5.89376	6.00307	6.01286	5.99425	6.00482	5.96284	5.95964	5.97543	5.92691	5.93174
26	PG75	2019-05-02	213300	226800	232200	240300	241650	199800	225450	222750	221400	261900	197100	5.32899	5.35564	5.36586	5.38075	5.38319	5.3006	5.35305	5.34782	5.34518	5.41814	5.29469
27	PG78	2019-05-13	74250	76950	62100	51300	82350	75600	59400	56700	94500	63450	49950	4.8707	4.88621	4.79309	4.71012	4.91566	4.87852	4.77379	4.75358	4.97543	4.80243	4.69854
28	PG80	2019-05-21	7560	5400	3240	4725	1890	2970	4050	3915	3240	3105	2970	3.87852	3.73	3.51055	3.6744	3.27646	3.47276	3.60746	3.59273	3.51055	3.49206	3.47276
29	PG81	2019-05-21	3240	4185	4320	1080	2160	135	4860	1890	2025	270	945	3.51055	3.6217	3.63548	3.03342	3.33445	2.13033	3.68664	3.27646	3.30643	2.43136	2.97543
30	PG82	2019-05-28	110430000	110025000	116640000	87210000	114345000	97335000	108810000	89775000	110430000	95175000	90450000	8.04309	8.04149	8.06685	7.94057	8.05822	7.98827	8.03667	7.95316	8.04309	7.97852	7.95641
31	PG83	2019-05-29	120150	98550	83700	109350	116100	75600	82350	90450	112050	94500	86400	5.07972	4.99366	4.92273	5.03882	5.06483	4.87852	4.91566	4.95641	5.04941	4.97543	4.93651
32	PG85	2019-05-30	18900	14850	10800	8100	10800	10800	3645	5940	8100	8640	4455	4.27646	4.17173	4.03342	3.90849	4.03342	4.03342	3.5617	3.77379	3.90849	3.93651	3.64885
33	PG87	2019-06-06	1215	1350	2700	135	2835	1755	2565	1080	2970	1485	135	3.08458	3.13033	3.43136	2.13033	3.45255	3.24428	3.40909	3.03342	3.47276	3.17173	2.13033
34	PG88	2019-06-06	7681500	7492500	8883000	7722000	7870500	8653500	9045000	8842500	8113500	4414500	5076000	6.88545	6.87463	6.94856	6.88773	6.896	6.93719	6.95641	6.94658	6.90921	6.64488	6.70552
35	PG89	2019-06-06	41850	20250	33750	16200	21600	27000	25650	13500	22950	20250	25650	4.6217	4.30643	4.52827	4.20952	4.33445	4.43136	4.40909	4.13033	4.36078	4.30643	4.40909
36	PG90	2019-06-12	41580000	34425000	34830000	34020000	33480000	32400000	37327500	32535000	33885000	34425000	35505000	7.61888	7.53687	7.54195	7.53173	7.52479	7.51055	7.57	7.51235	7.53001	7.53687	7.55029
37	PG91	2019-06-20	33750	41850	41850	36450	47250	59400	40500	45900	45900	40500	48600	4.52827	4.6217	4.6217	4.5617	4.6744	4.77379	4.60746	4.66181	4.66181	4.60746	4.68664
38	PG92	2019-06-20	101250	62100	74250	55350	71550	41850	49950	48600	64800	74250	79650	5.0054	4.79309	4.8707	4.74312	4.85461	4.6217	4.69854	4.68664	4.81158	4.8707	4.90119
39	PG95	2019-06-26	8100	10800	10800	10260	10800	9450	12150	12150	9990	10800	9180	3.90849	4.03342	4.03342	4.01115	4.03342	3.97543	4.08458	4.08458	3.99957	4.03342	3.96284
40	PG96	2019-07-09	10800	6480	8640	6480	6480	4185	3375	6210	4725	3780	4725	4.03	3.81158	3.93651	3.81158	3.81158	3.6217	3.52827	3.79309	3.6744	3.57749	3.6744
