# Supplementary material for: Stability of hepatitis B virus pregenomic RNA in plasma specimens under various temperatures and storage conditions
Source: PeerJ. 2021 Apr 14;9:e11207. doi: 10.7717/peerj.11207 (PMC8052958; doi:10.7717/peerj.11207)
Supplement: Supplemental Information 4 [file peerj-09-11207-s004.xlsx]

## Sheet: Sheet3
Sample (copies/ml)	-80°C				-20°C
	1 cycle	2 cycle	3 cycle	4 cycle	1 cycle	2 cycle	3 cycle	4 cycle
1	29835000	33358500	27877500	30820500	34614000	34992000	31887000	32521500
2	58455000	58590000	56970000	57105000	53865000	63045000	59130000	61560000
3	59130000	61155000	64935000	77895000	70200000	70200000	66420000	71955000
4	67770000	63720000	62910000	58725000	63720000	64125000	64665000	63450000
5	14040000	18859500	16902000	16375500	15525000	15970500	15903000	17874000
6	122850000	129600000	125550000	120150000	118800000	114750000	125550000	120150000
7	4306500	2727000	3402000	3523500	2322000	3105000	4077000	4009500
8	6520500	6345000	6129000	7411500	6561000	6102000	6250500	6250500
9	24718500	24556500	23112000	26163000	26905500	24084000	25002000	24286500
10	52110000	51975000	54405000	56902500	53730000	54135000	53595000	51975000
Sample log (copies/ml)	-80°C				-20°C
	1 cycle	2 cycle	3 cycle	4 cycle	1 cycle	2 cycle	3 cycle	4 cycle
1	7.47473	7.52321	7.44525	7.48884	7.53925	7.54397	7.50361	7.51217
2	7.76682	7.76782	7.75565	7.75667	7.73131	7.79965	7.77181	7.7893
3	7.77181	7.78643	7.81248	7.89151	7.84634	7.84634	7.8223	7.85706
4	7.83104	7.80428	7.79872	7.76882	7.80428	7.80703	7.81067	7.80243
5	7.14737	7.27553	7.22794	7.21419	7.19103	7.20332	7.20148	7.25222
6	8.08938	8.11261	8.09882	8.07972	8.07482	8.05975	8.09882	8.07972
7	6.63412	6.43569	6.53173	6.54697	6.36586	6.49206	6.61034	6.60309
8	6.81428	6.80243	6.78739	6.86991	6.81697	6.78547	6.79591	6.79591
9	7.39302	7.39017	7.36384	7.41769	7.42984	7.38173	7.39797	7.38536
10	7.71692	7.71579	7.73564	7.75513	7.73022	7.73348	7.72912	7.71579
